# Supplementary material
Source: PubMed Central journal article supplement (PMC3192255)
Supplement: NIHMS326521-supplement-1_si_001.pdf [file NIHMS326521-supplement-1_si_001.pdf]

Supporting Information For

Substrate-Triggered Activation of a Synthetic  $[\text{Fe}_2(\mu\text{-O})_2]$  Diamond Core  
for C–H Bond Cleavage

Genqiang Xue, Alexander Pokutsa, and Lawrence Que, Jr.\*

Department of Chemistry and Center for Metals in Biocatalysis, University of Minnesota,  
Minneapolis, MN 55455

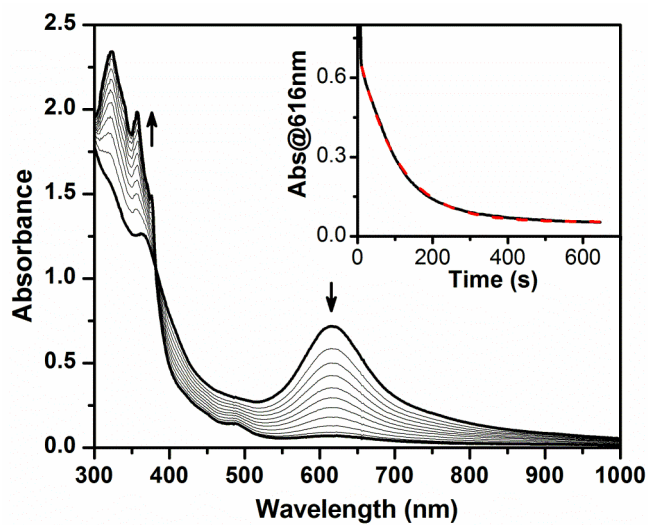

**Figure S1.** Time-resolved spectral changes during the oxidation of 10 mM DHA by **1** at  $-30\text{ }^\circ\text{C}$  in MeCN in the presence of 1.0 M  $\text{H}_2\text{O}$ . Inset: time trace at 616 nm (black solid line) together with the fit (red dashed line) using a first-order rate constant of  $0.0099\text{ s}^{-1}$ .

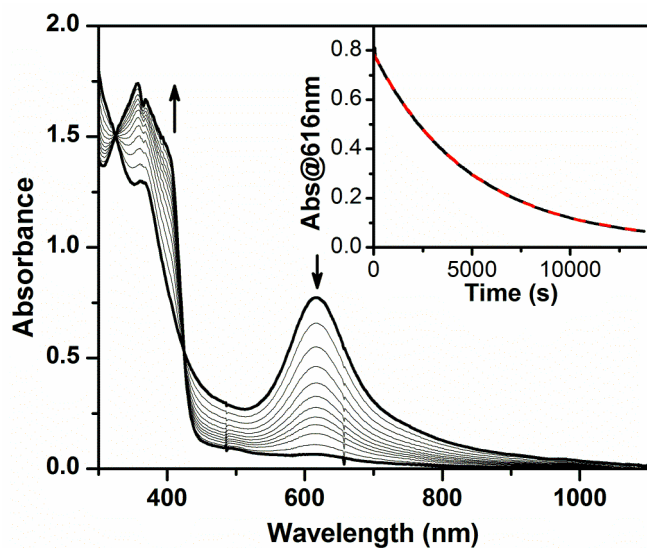

**Figure S2.** Time-resolved spectral changes during the oxidation of 1.0 mM CH<sub>3</sub>OH by **1** at -30 °C in MeCN in the presence of 50 mM H<sub>2</sub>O. Inset: time trace at 616 nm (black solid line) together with the fit (red dashed line) using a first-order rate constant of  $2.0 \times 10^{-4} \text{ s}^{-1}$ .

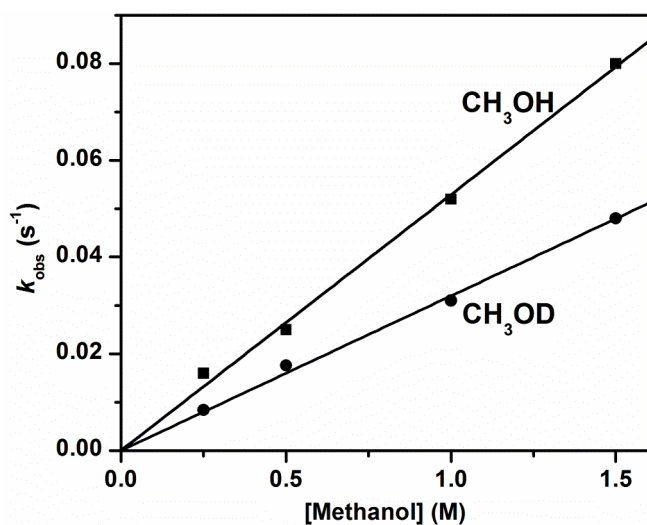

**Figure S3.**  $k_{\text{obs}}$ -vs-[substrate] plots for oxidation of CH<sub>3</sub>OH (squares) or CH<sub>3</sub>OD by **1** in MeCN in the presence of 10 mM 2,6-lutidine. The corresponding second order rate constants ( $k_2$ ) are  $0.053 \text{ M}^{-1} \text{ s}^{-1}$  and  $0.032 \text{ M}^{-1} \text{ s}^{-1}$ , and KIE is 1.6. The reaction rates were measured under Ar at -30 °C.

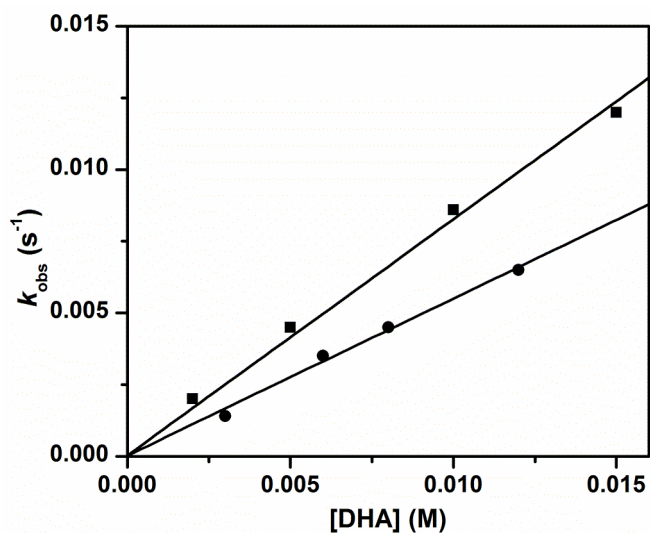

**Figure S4.**  $k_{\text{obs}}$ -vs-[DHA] plots for oxidation by **1** in MeCN in the presence of 1.0 M H<sub>2</sub>O (squares) or D<sub>2</sub>O (circles). The corresponding second order rate constants ( $k_2$ ) are 0.82 M<sup>-1</sup> s<sup>-1</sup> and 0.56 M<sup>-1</sup> s<sup>-1</sup>, and KIE is 1.5. The reaction rates were measured under Ar at -30 °C.

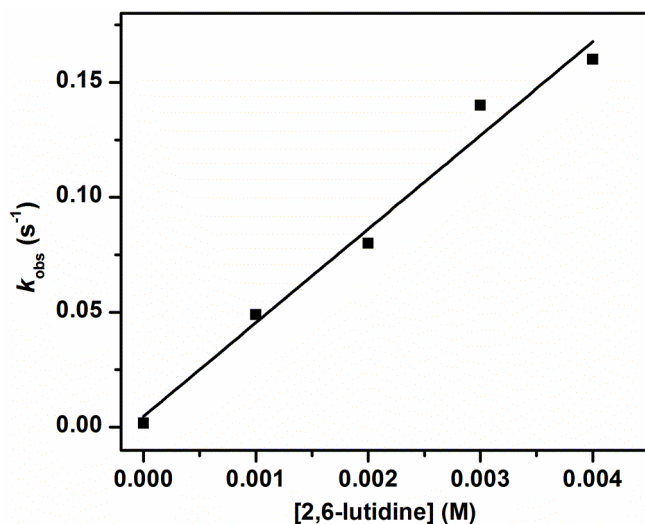

**Figure S5.**  $k_{\text{obs}}$ -vs-[2,6-lutidine] plot for oxidation of 2.0 mM DHA by **1** in MeCN with 1.0 M H<sub>2</sub>O at -30 C under Ar. See Table S5 for list of data in the plot.

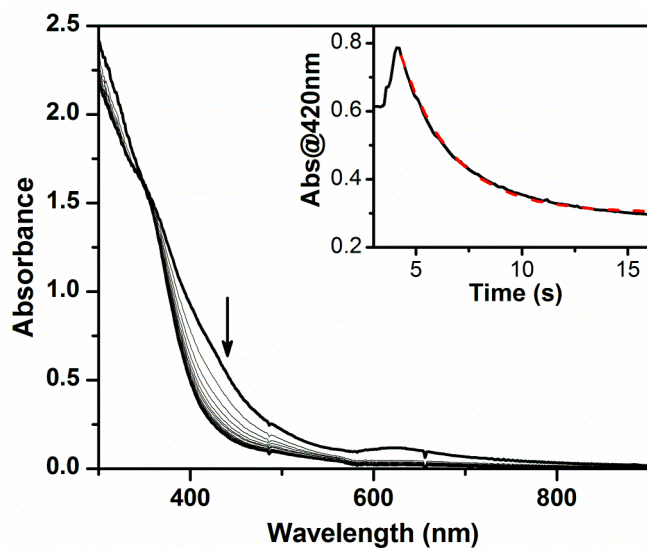

**Figure S6.** Time resolved spectral changes during self-decay of **1-OCH<sub>3</sub>** at -50 °C in 3:1 CH<sub>2</sub>Cl<sub>2</sub>-MeCN. Inset: time trace at 420 nm (black solid line, one data point per 0.1 second) together with the fit (red dashed line) using a first order rate constant of 0.40 s<sup>-1</sup>.

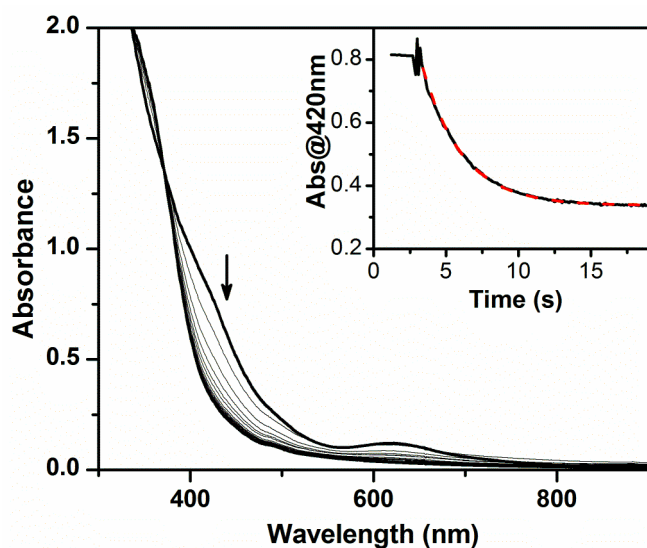

**Figure S7.** Time-resolved spectral changes during the oxidation of DHA by **1-OCD<sub>3</sub>** at -80 °C in 3:1 CH<sub>2</sub>Cl<sub>2</sub>-MeCN. Inset: time trace at 420 nm (black solid line, one data point per 0.1 second) together with the fit (red dashed line) using a first order rate constant of 0.36 s<sup>-1</sup>.

**Table S1.** Summary of  $k_2'$  values for substrate oxidations by **1** and **3** at -30 °C under Ar.

| Substrate        | BDE kcal mol <sup>-1</sup> | $k_2'$ (M <sup>-1</sup> s <sup>-1</sup> ) by <b>3</b><br>in MeCN | $k_2'$ (M <sup>-1</sup> s <sup>-1</sup> ) by <b>1</b><br>in MeCN with<br>0.05 M H <sub>2</sub> O | $k_2'$ (M <sup>-1</sup> s <sup>-1</sup> ) by <b>1</b><br>in MeCN with<br>1.0 M H <sub>2</sub> O |
|------------------|----------------------------|------------------------------------------------------------------|--------------------------------------------------------------------------------------------------|-------------------------------------------------------------------------------------------------|
| xanthene         | 75.5 <sup>1</sup>          | ND                                                               | 4.8 x 10 <sup>-2</sup>                                                                           | 0.84                                                                                            |
| DHA              | 78 <sup>1</sup>            | 1.2                                                              | 7.0 x 10 <sup>-3</sup>                                                                           | 0.20                                                                                            |
| fluorene         | 80 <sup>1</sup>            | 0.22                                                             | 4.1 x 10 <sup>-3</sup>                                                                           | 0.16                                                                                            |
| triphenylmethane | 81 <sup>2</sup>            | 0.16                                                             | ND                                                                                               | ND                                                                                              |
| diphenylmethane  | 82 <sup>2</sup>            | ND                                                               | ND                                                                                               | 6.5 x 10 <sup>-3</sup>                                                                          |
| tetralin         | 85 <sup>2</sup>            | 0.10                                                             | 6.9 x 10 <sup>-5</sup>                                                                           | 1.4 x 10 <sup>-3</sup>                                                                          |
| ethylbenzene     | 87 <sup>1</sup>            | 2.7 x 10 <sup>-3</sup>                                           | ND                                                                                               | 1.0 x 10 <sup>-4</sup>                                                                          |
| toluene          | 90 <sup>1</sup>            | ND                                                               | ND                                                                                               | 4.0 x 10 <sup>-5</sup>                                                                          |
| benzhydrol       | 79 <sup>3</sup>            | ND                                                               | 4.7 x 10 <sup>-3</sup>                                                                           | ND                                                                                              |
| benzyl alcohol   | 85 <sup>4</sup>            | 0.047                                                            | 5.0 x 10 <sup>-4</sup>                                                                           | 1.7 x 10 <sup>-3</sup>                                                                          |
| 2-hexanol        | 90 <sup>4</sup>            | 2.2 x 10 <sup>-3</sup>                                           | 2.1 x 10 <sup>-5</sup>                                                                           | ND                                                                                              |
| 1-hexanol        | 93 <sup>4</sup>            | 3.6 x 10 <sup>-4</sup>                                           | 1.5 x 10 <sup>-4</sup>                                                                           | ND                                                                                              |
| isobutanol       | 93 <sup>4</sup>            | ND                                                               | 2.0 x 10 <sup>-5</sup>                                                                           | ND                                                                                              |
| ethanol          | 93 <sup>4</sup>            | ND                                                               | 1.4 x 10 <sup>-4</sup>                                                                           | ND                                                                                              |
| methanol         | 96 <sup>5</sup>            | 2 x 10 <sup>-5</sup>                                             | 6.0 x 10 <sup>-5</sup>                                                                           | 6.3 x 10 <sup>-5</sup>                                                                          |

**Table S2.** Rate constants for methanol (1.0 M) oxidation by **1** in MeCN at -30 °C under Ar (Figure 6). For the  $k_{\text{obs}}$  versus  $\text{p}K_{\text{a}}$  experiments, 10 mM bases were added to mixture of **1** and methanol.

|                                           |      |      |      |      |      |     |    |    |
|-------------------------------------------|------|------|------|------|------|-----|----|----|
| [2,6-lutidine] / mM                       | 0    | 2.0  | 4.0  | 6.0  | 8.0  | 10  | 20 | 50 |
| $k_{\text{obs}}$ (x $10^{-3}$ s $^{-1}$ ) | 0.20 | 1.6  | 2.6  | 3.8  | 4.1  | 5.7 | 11 | 23 |
| [2,4,6-collidine] / mM                    | 0    | 2.0  | 4.0  | 6.0  | 10   |     |    |    |
| $k_{\text{obs}}$ (x $10^{-3}$ s $^{-1}$ ) | 0.20 | 3.2  | 6.0  | 9.2  | 14   |     |    |    |
| $\text{p}K_{\text{a}}$                    | 5.17 | 5.97 | 6.51 | 6.77 | 7.48 |     |    |    |
| $k_{\text{obs}}$ (x $10^{-3}$ s $^{-1}$ ) | 0.23 | 0.80 | 1.4  | 5.7  | 14   |     |    |    |

**Table S3.** Comparison of the rates for the oxidation of DHA<sup>a</sup> and methanol<sup>b</sup>.

| Oxidant                               | T/Solvent                                                      | Rate constants                                   |
|---------------------------------------|----------------------------------------------------------------|--------------------------------------------------|
| <b>DHA oxidation<sup>a</sup></b>      |                                                                |                                                  |
| <b>1</b> + 1 M H <sub>2</sub> O       | -30 °C/CH <sub>3</sub> CN                                      | 0.80 M <sup>-1</sup> s <sup>-1</sup>             |
| <b>2</b> + 1 M H <sub>2</sub> O       | -30 °C/CH <sub>3</sub> CN                                      | 0.15 M <sup>-1</sup> s <sup>-1</sup>             |
| <b>2</b>                              | -80 °C/3:1 CH <sub>2</sub> Cl <sub>2</sub> :CH <sub>3</sub> CN | 10 <sup>-5</sup> M <sup>-1</sup> s <sup>-1</sup> |
| <b>4</b>                              | -80 °C/3:1 CH <sub>2</sub> Cl <sub>2</sub> :CH <sub>3</sub> CN | 10 <sup>-4</sup> M <sup>-1</sup> s <sup>-1</sup> |
| <b>2</b> -OH                          | -80 °C/3:1 CH <sub>2</sub> Cl <sub>2</sub> :CH <sub>3</sub> CN | 28 M <sup>-1</sup> s <sup>-1</sup>               |
| <b>2</b> -OCD <sub>3</sub>            | -80 °C/3:1 CH <sub>2</sub> Cl <sub>2</sub> :CH <sub>3</sub> CN | 360 M <sup>-1</sup> s <sup>-1</sup>              |
| <b>Methanol oxidation<sup>b</sup></b> |                                                                |                                                  |
| <b>1</b> (+ 2.0 M CH <sub>3</sub> OH) | -30 °C/CH <sub>3</sub> CN                                      | 4.0 x 10 <sup>-4</sup> s <sup>-1</sup>           |
| <b>2</b> (+ 2.0 M CH <sub>3</sub> OH) | -30 °C/CH <sub>3</sub> CN                                      | 3.3 x 10 <sup>-5</sup> s <sup>-1</sup>           |
| <b>4</b> (+ 2.0 M CH <sub>3</sub> OH) | -30 °C/CH <sub>3</sub> CN                                      | 5 x 10 <sup>-6</sup> s <sup>-1</sup>             |

<sup>a</sup>DHA oxidation rates by **2**, **4** and **2**-OH were reported from ref 6. <sup>b</sup>Only first order rate constants for the oxidation of 2 M CH<sub>3</sub>OH are listed, because the reaction rates for **2** and **4** at lower methanol concentrations were too slow to allow second order rate constants to be obtained.

**Table S4.** Rate constants measured for the Eyring plot for the self-decay of **2**-OCH<sub>3</sub> (Figure 9, inset). All  $k_{\text{obs}}$  values are averages of data from three measurements.

|                                  |       |       |       |       |      |      |      |      |
|----------------------------------|-------|-------|-------|-------|------|------|------|------|
| T (°C)                           | -85   | -80   | -75   | -70   | -65  | -60  | -55  | -50  |
| $k_{\text{obs}}/(\text{s}^{-1})$ | 0.012 | 0.024 | 0.040 | 0.080 | 0.13 | 0.33 | 0.44 | 0.78 |

**Table S5.** Rate constants for DHA (2 mM) oxidation by **1** in the presence of 1 M H<sub>2</sub>O and varying amounts of 2,6-lutidine in MeCN at -30 °C under Ar (Figure S5).

|                                  |        |       |       |      |      |
|----------------------------------|--------|-------|-------|------|------|
| [2,6-lutidine]/mM                | 0      | 1.0   | 2.0   | 3.0  | 4.0  |
| $k_{\text{obs}}/(\text{s}^{-1})$ | 0.0018 | 0.049 | 0.080 | 0.14 | 0.16 |

## References

- (1) Bryant, J. R.; Mayer, J. M. *J. Am. Chem. Soc.* **2003**, *125*, 10351-10361.
- (2) Goldsmith, C. R.; Jonas, R. T.; Stack, T. D. P. *J. Am. Chem. Soc.* **2002**, *124*, 83-96.
- (3) Finn, M.; Friedline, R.; Suleman, N. K.; Wohl, C. J.; Tanko, M. M. *J. Am. Chem. Soc.* **2004**, *126*, 7578-7584.
- (4) Tumanov, V. E.; Denisov, E. T. *Russ. J. Phys. Chem.* **1996**, *70*, 741-746.
- (5) Blanksby, S. J.; Ellison, G. B. *Acc. Chem. Res.* **2003**, *36*, 255-263.
- (6) Xue, G.; De Hont, R.; Münck, E.; Que, L., Jr. *Nature Chem.* **2010**, *2*, 400-405.
